# Supplementary material for: Measuring Fisher Information Accurately in Correlated Neural Populations
Source: PubMed Central journal article supplement (PMC4451760; doi:10.1371/journal.pcbi.1004218), 2015-06-01
Supplement: pcbi.1004218.s006.pdf [file pcbi.1004218.s006.pdf]

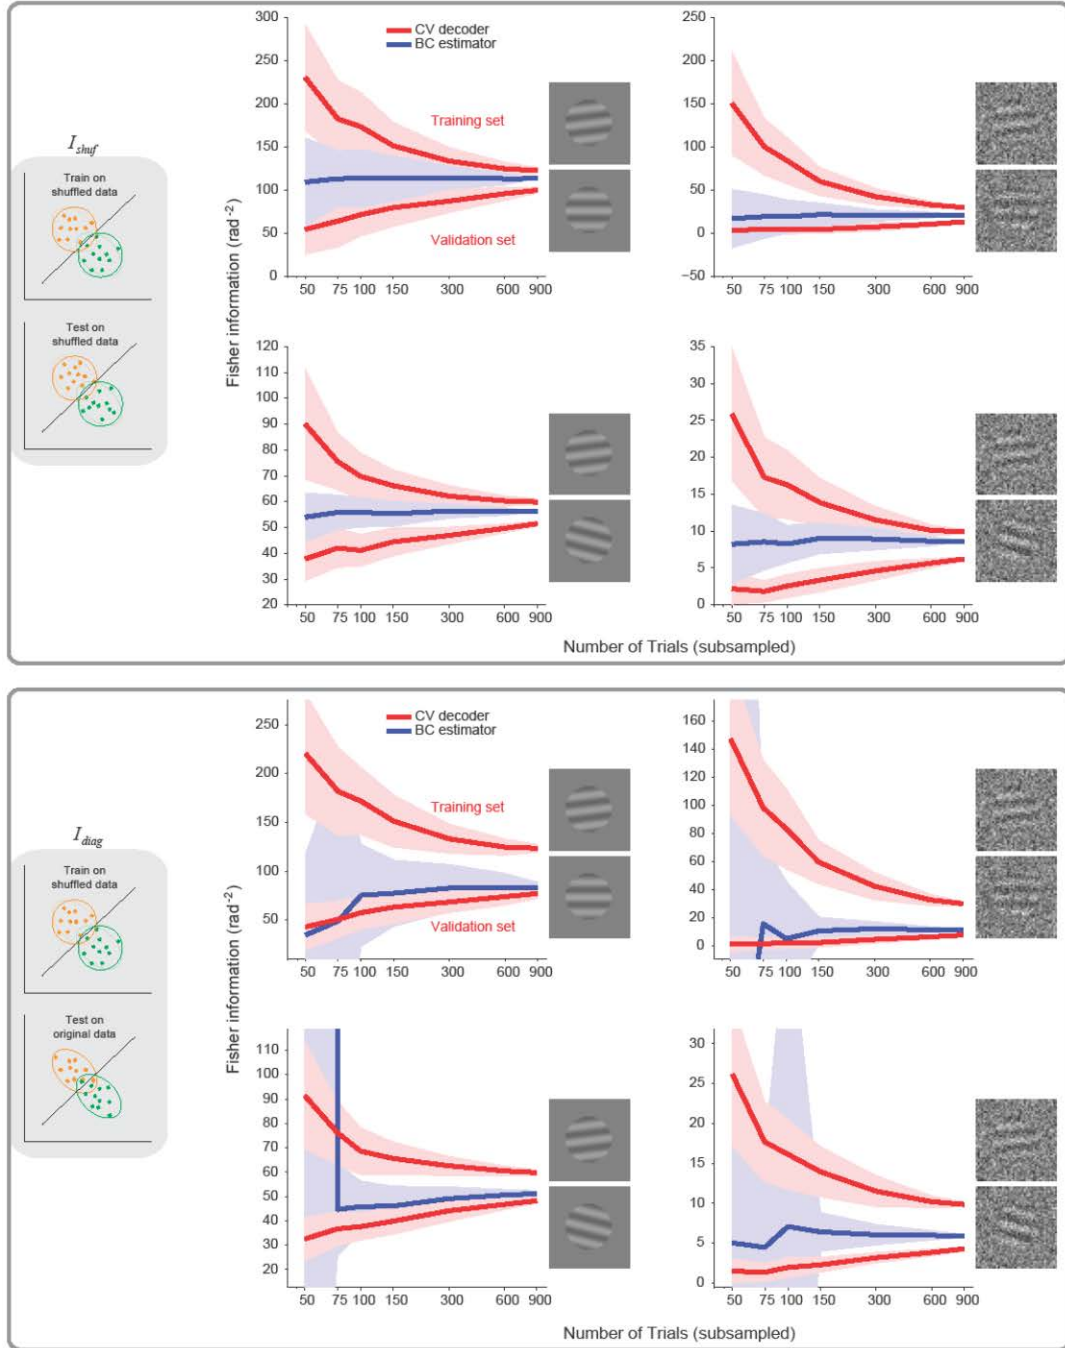

**Figure S5.** Fisher information when removing correlations entirely by shuffling the data (top, denoted  $I_{shuf}$ ), and when decoding under the assumption that the data are independent (bottom, denoted  $I_{diag}$ ). Data are recorded from a population of  $N=52$  macaque V1 neurons. All conventions are as in Figure 5 in the main text.
