# Supplementary material for: Measuring Fisher Information Accurately in Correlated Neural Populations
Source: PubMed Central journal article supplement (PMC4451760; doi:10.1371/journal.pcbi.1004218), 2015-06-01
Supplement: pcbi.1004218.s007.pdf [file pcbi.1004218.s007.pdf]

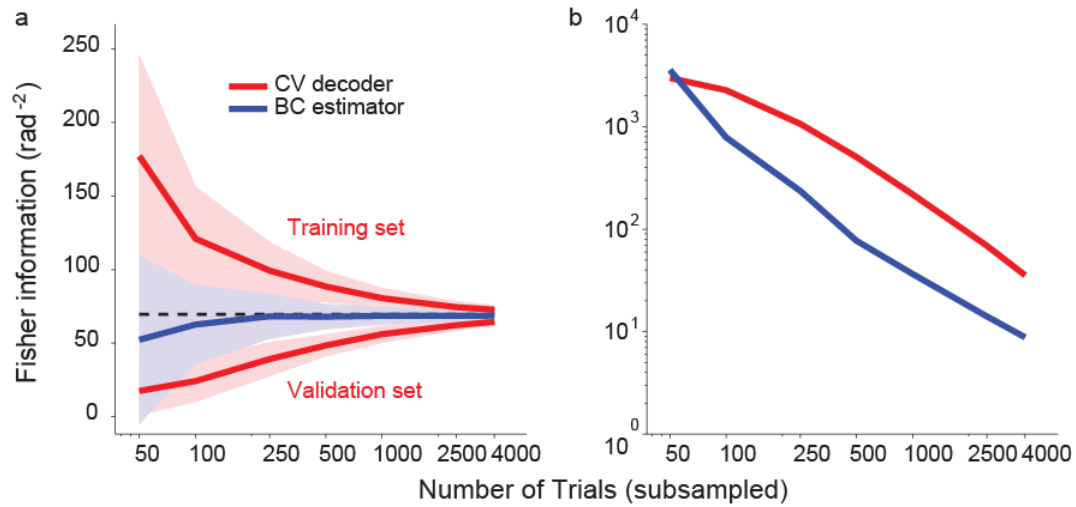

**Figure S6. Comparison of estimators at low spike counts.** Data were generated using a model with Von Mises tuning curves and independent Poisson variability, with  $N=50$  neurons, and population-averaged spike count per trial matched to main Figure 7a,b. **(a)** Estimate of the Fisher information obtained by decoding (red) or direct estimation with bias correction (blue). The continuous lines represent the mean, the shaded area represents  $\pm 1$  std across experiments, computed by bootstrap. **(b)** MSE of the decoder-based estimate (red) and the direct estimator (blue).
